# Supplementary material for: Health care workers’ perceptions of point-of-care testing in a low-income country—A qualitative study in Southwestern Uganda
Source: PLoS One. 2017 Jul 27;12(7):e0182005. doi: 10.1371/journal.pone.0182005 (PMC5547696; doi:10.1371/journal.pone.0182005)
Supplement: S1 Appendix — An overview of the coding structure during data analysis. (XLSX) [file pone.0182005.s001.xlsx]

## Sheet: Blad1
Domains	Categories	Sub-categories	Codes
Perceptions on the utliziation of POC tests	POC testing strengthens the health system	POC tests are practical in the local context	User-friendly
			Easy to store
			Easy to learn
			Affordable
			Allow patients to test themselves
			Maintenance-free
			Allow analyses outside of lab
			Portable and field-friendly
			They reduce the workload of the lab
		POC tests improve management of patients	More rapid diagnoses
			Simpler diagnoses
			Supports clinical decision making
			Targeted treatment
			Prevent drug resistance
			Lifesaving in medical emergencies
	Current tests do not meet the needs of the health system	Distrust in test results	Overly sensitive to handling/storage
			Low senstivitiy/specificity
			Old infections reported as active ones
			Unclear results
			Counterfeit test kits
		Improper use of POC tests	Incorrect testing procedures.
			Lack of knowledge amongst users
			Too simple - conventional methods underutilized
			Overreliance in test results
		Imperfection of POC tests in the local context	Expensive
			Often out of stock
			Bulky
			Single-analytic
Requests for an ideal POC and its utilization	A test adapted to the local context	Resource-efficient	Compatible/unneccessary accessories
			Low-cost
			Quick results
			Easy to use
			Always available
		Functional in the local environment	Heat stable
			Not need electricity
	A test with a pre-defined implementation in the health system	Should be distributed according to need	Distributed according to local epidemiology
			Distributed according to local patient load
		Preparations ought to be made before implementation	Pre-defined role in the health system
			Proper training of users
		Management of testing should be protocol based	Stated action plans for test results
			Test results confirmed by conventional methods
	A test with the ability to improve the care of patients	Accurate diagnoses	High sensitivity/specificity
			Trustworthy and indisputable results
		Patient-friendly diagnoses	Less invasive sampling methods
		Support management of all diseases	Show etiology of infection
			Support targeted treatment
			Requests for specific tests listed (Table 6)
The role of POC testing in the local health system	Disagreement on the preferred level of use	Primary health care has unmet needs of POC	No alternative methods
			Support decisions regarding referral
			Support determining severity of disease
			Uncomplicated tests needed
			Tests for most common diseases needed
		All levels need them	Communicable diseases are managed 'everywhere'
			Tests needed broadly due to patient flows not as intended
		Need based on clinical context	Different needs between specialties
			Levels have different capacities to manage results
